# Supplementary material for: Amphibian survival compromised by long-term effects of chytrid fungus
Source: Springer Nature journal article supplement (doi:10.1007/s10531-022-02525-3), 2022-12-03
Supplement: MOESM2 [file 23787546]

**Results of the Goodness-of-fit (GOF) test performed for the capture-recapture dataset prior to the analyses in E-SURGE**

Numbers of degrees of freedom (*df*), chi-square statistics (χ2), overdispersion coefficients (ĉ) and p-values obtained both globally and for each component of the Multistate GOF test are provided. Overdispersion coefficients (ĉ values) are calculated as χ2/*df*.

| **Test** | ***df*** | **χ2** | **ĉ** | ***p-value*** |
| --- | --- | --- | --- | --- |
| **Test 3G** | 146 | 208.193 | 1.426 | 0.001 |
| **Test M** | 20 | 36.558 | 1.828 | 0.013 |
| **Global test** | 166 | 244.751 | 1.474 | 0.000 |
